# Supplementary material for: Integrative Genomics-Based Discovery of Novel Regulators of the Innate Antiviral Response
Source: PLoS Comput Biol. 2015 Oct 20;11(10):e1004553. doi: 10.1371/journal.pcbi.1004553 (PMC4618338; doi:10.1371/journal.pcbi.1004553)
Supplement: S3 Table — (XLSX) [file pcbi.1004553.s017.xlsx]

## Sheet: RNAi screens antiviral factors
	Krishnan et al. (2008)	Zhou et al. (2008)	Tai et al. (2009)	Li et al. (2009)	Shapira et al. (2009)	Brass et al. (2009)	Coyne et al. (2011)		Meta analysis
Reference	Krishnan, M.N., Ng, A., Sukumaran, B., Gilfoy, F.D., Uchil, P.D., Sultana, H., Brass, A.L., Adametz, R., Tsui, M., Qian, F., et al. (2008). RNA interference screen for human genes associated with West Nile virus infection. Nature 455, 242–245.	Zhou, H., Xu, M., Huang, Q., Gates, A.T., Zhang, X.D., Castle, J.C., Stec, E., Ferrer, M., Strulovici, B., Hazuda, D.J., et al. (2008). Genome-scale RNAi screen for host factors required for HIV replication. Cell Host Microbe 4, 495–504.	Tai, A.W., Benita, Y., Peng, L.F., Kim, S.-S., Sakamoto, N., Xavier, R.J., and Chung, R.T. (2009). A functional genomic screen identifies cellular cofactors of hepatitis C virus replication. Cell Host Microbe 5, 298–307.	Li, Q., Brass, A.L., Ng, A., Hu, Z., Xavier, R.J., Liang, T.J., and Elledge, S.J. (2009). A genome-wide genetic screen for host factors required for hepatitis C virus propagation. Proc. Natl. Acad. Sci. U.S.a. 106, 16410–16415.	Shapira, S.D., Gat-Viks, I., Shum, B.O.V., Dricot, A., de Grace, M.M., Wu, L., Gupta, P.B., Hao, T., Silver, S.J., Root, D.E., et al. (2009). A physical and regulatory map of host-influenza interactions reveals pathways in H1N1 infection. Cell 139, 1255–1267.	Brass, A.L., Huang, I.-C., Benita, Y., John, S.P., Krishnan, M.N., Feeley, E.M., Ryan, B.J., Weyer, J.L., van der Weyden, L., Fikrig, E., et al. (2009). The IFITM proteins mediate cellular resistance to influenza A H1N1 virus, West Nile virus, and dengue virus. Cell 139, 1243–1254.	Coyne, C.B., Bozym, R., Morosky, S.A., Hanna, S.L., Mukherjee, A., Tudor, M., Kim, K.S., and Cherry, S. (2011). Comparative RNAi screening reveals host factors involved in enterovirus infection of polarized endothelial monolayers. Cell Host Microbe 9, 70–82.
Virus	West Nile virus	HIV-1	Hepatitis C virus	Hepatitis C virus	Influenza A H1N1	Influenza A H1N1	Enteroviruses: coxsackievirus B (CVB) and poliovirus (PV)
Cell type	HeLa	HeLa P4/R5	Huh7/Rep-Feo	Huh 7.5.1	primary human bronchial epithelial cells (HBEC)	osteosarcoma cells (U2OS)	human brain microvascular endothelial cells (HBMEC)
Number of genes tested	genome-wide	genome-wide	genome-wide	genome-wide	1745	17877	5492
Numer of genes with antiviral activity (antiviral host factors)	22	1	11	25	92	4	21		173
Genes (Entrez gene ID)	266	2760	3099	778	567	8460	207		207
	1668		4600	1441	637	10410	208		208
	2281		7780	3190	657	55339	375		266
	3661		9778	3489	694	126789	1056		375
	4246		10480	3614	786		2101		567
	4477		23770	3736	810		2271		637
	8710		51187	5794	1050		2931		657
	9054		51454	8784	1052		2997		694
	9122		55854	8874	1677		3654		778
	9284		57532	9132	1718		4216		786
	9732		389610	10801	1871		5536		810
	9851			11066	1960		5594		1050
	9926			23250	2048		5921		1052
	10360			23406	2113		9826		1056
	10541			26121	2149		10125		1441
	51171			54893	2299		10803		1668
	57731			55540	2872		23564		1677
	80039			55611	3052		50487		1718
	84541			80178	3099		50506		1871
	85300			81629	3106		51311		1960
	93953			118424	3159		64333		2048
	257062			124739	3228				2101
				136227	3275				2113
				200504	3661				2149
				283471	3705				2271
					3988				2281
					4091				2299
					4293				2760
					5272				2872
					5333				2931
					5362				2997
					5598				3052
					5609				3099
					5699				3106
					5997				3159
					6102				3190
					6432				3228
					6788				3275
					7025				3489
					7107				3614
					7157				3654
					7342				3661
					8718				3705
					8829				3736
					9516				3988
					9612				4091
					9665				4216
					9903				4246
					10217				4293
					10344				4477
					10365				4600
					10410				5272
					10581				5333
					10766				5362
					10884				5536
					11184				5594
					11235				5598
					11346				5609
					22838				5699
					23075				5794
					23168				5921
					23424				5997
					23429				6102
					23529				6432
					26234				6788
					26353				7025
					29775				7107
					30849				7157
					51447				7342
					54205				7780
					54930				8460
					54970				8710
					55281				8718
					55602				8784
					55958				8829
					56259				8874
					56681				9054
					56913				9122
					57130				9132
					57148				9284
					59284				9516
					60489				9612
					64127				9665
					79803				9732
					80148				9778
					80789				9826
					81848				9851
					83878				9903
					84676				9926
					94239				10125
					166336				10217
					246778				10344
									10360
									10365
									10410
									10480
									10541
									10581
									10766
									10801
									10803
									10884
									11066
									11184
									11235
									11346
									22838
									23075
									23168
									23250
									23406
									23424
									23429
									23529
									23564
									23770
									26121
									26234
									26353
									29775
									30849
									50487
									50506
									51171
									51187
									51311
									51447
									51454
									54205
									54893
									54930
									54970
									55281
									55339
									55540
									55602
									55611
									55854
									55958
									56259
									56681
									56913
									57130
									57148
									57532
									57731
									59284
									60489
									64127
									64333
									79803
									80039
									80148
									80178
									80789
									81629
									81848
									83878
									84541
									84676
									85300
									93953
									94239
									118424
									124739
									126789
									136227
									166336
									200504
									246778
									257062
									283471
									389610
