# Supplementary material for: Integrative Genomics-Based Discovery of Novel Regulators of the Innate Antiviral Response
Source: PLoS Comput Biol. 2015 Oct 20;11(10):e1004553. doi: 10.1371/journal.pcbi.1004553 (PMC4618338; doi:10.1371/journal.pcbi.1004553)
Supplement: S4 Table — (XLSX) [file pcbi.1004553.s018.xlsx]

## Sheet: Domains RLR pathway components
Pfam accession number	Pfam description	Domain occurrences in proteome	Total domain occurrences in proteome	Proteome odds	Domain occurrences in RLR pathway components	Total domain occurrences in RLR pathway components	RLR pathway components odds	Odds ratio	Log2 odds ratio	Fisher’s exact P	Benjamini-Hochberg-corrected Fisher’s exact P	RLR pathway components with domain
PF00069	Protein kinase domain	362	30784	0.0117594	12	83	0.144578	12.2947	3.61997	2.67029e-10	1.06812e-08	IKKA_HUMAN, IKKB_HUMAN, IKKE_HUMAN, M3K1_HUMAN, MK08_HUMAN, MK09_HUMAN, MK10_HUMAN, MK11_HUMAN, MK12_HUMAN, MK13_HUMAN, MK14_HUMAN, TBK1_HUMAN
PF01335	Death effector domain	8	30784	0.000259875	4	83	0.0481928	185.446	7.53485	3.41019e-09	6.82039e-08	CASP8_HUMAN, CASP8_HUMAN, CASPA_HUMAN, FADD_HUMAN
PF11648	C-terminal domain of RIG-I	3	30784	9.74532e-05	3	83	0.0361446	370.892	8.53485	1.88992e-08	1.88992e-07	DDX58_HUMAN, DHX58_HUMAN, IFIH1_HUMAN
PF12845	TBD domain	3	30784	9.74532e-05	3	83	0.0361446	370.892	8.53485	1.88992e-08	1.88992e-07	AZI2_HUMAN, TANK_HUMAN, TBKB1_HUMAN
PF00531	Death domain	34	30784	0.00110447	4	83	0.0481928	43.6343	5.44739	2.14185e-06	1.71348e-05	FADD_HUMAN, NFKB1_HUMAN, RIPK1_HUMAN, TRADD_HUMAN
PF00917	MATH domain	12	30784	0.000389813	3	83	0.0361446	92.7229	6.53485	4.08548e-06	2.33456e-05	TRAF2_HUMAN, TRAF3_HUMAN, TRAF6_HUMAN
PF02176	TRAF-type zinc finger	12	30784	0.000389813	3	83	0.0361446	92.7229	6.53485	4.08548e-06	2.33456e-05	TRAF2_HUMAN, TRAF3_HUMAN, TRAF6_HUMAN
PF12179	I-kappa-kinase-beta NEMO binding domain	2	30784	6.49688e-05	2	83	0.0240964	370.892	8.53485	7.18217e-06	3.59109e-05	IKKA_HUMAN, IKKB_HUMAN
PF00271	Helicase conserved C-terminal domain	110	30784	0.00357328	5	83	0.060241	16.8587	4.07542	1.23631e-05	5.49471e-05	DDX3X_HUMAN, DDX3Y_HUMAN, DDX58_HUMAN, DHX58_HUMAN, IFIH1_HUMAN
PF04851	Type III restriction enzyme, res subunit	3	30784	9.74532e-05	2	83	0.0240964	247.261	7.94989	2.15087e-05	8.60349e-05	DHX58_HUMAN, IFIH1_HUMAN
PF00023	Ankyrin repeat	89	30784	0.00289111	4	83	0.0481928	16.6693	4.05912	0.00010075	0.000366365	IKBA_HUMAN, IKBB_HUMAN, IKBB_HUMAN, NFKB1_HUMAN
PF10401	Interferon-regulatory factor 3	7	30784	0.000227391	2	83	0.0240964	105.969	6.7275	0.000149508	0.00049836	IRF3_HUMAN, IRF7_HUMAN
PF00605	Interferon regulatory factor transcription factor	9	30784	0.00029236	2	83	0.0240964	82.4203	6.36493	0.000255402	0.000785851	IRF3_HUMAN, IRF7_HUMAN
PF00554	Rel homology domain (RHD)	10	30784	0.000324844	2	83	0.0240964	74.1783	6.21293	0.000318693	0.000910551	NFKB1_HUMAN, TF65_HUMAN
PF00656	Caspase domain	15	30784	0.000487266	2	83	0.0240964	49.4522	5.62796	0.00073713	0.00196568	CASP8_HUMAN, CASPA_HUMAN
PF00270	DEAD/DEAH box helicase	74	30784	0.00240385	3	83	0.0361446	15.0361	3.91036	0.00106718	0.00266796	DDX3X_HUMAN, DDX3Y_HUMAN, DDX58_HUMAN
PF13923	Zinc finger, C3HC4 type (RING finger)	88	30784	0.00285863	3	83	0.0361446	12.644	3.66038	0.00175828	0.00413713	RN125_HUMAN, TRAF6_HUMAN, TRI25_HUMAN
PF00639	PPIC-type PPIASE domain	1	30784	3.24844e-05	1	83	0.0120482	370.892	8.53485	0.00269621	0.00468905	PIN1_HUMAN
PF02733	Dak1 domain	1	30784	3.24844e-05	1	83	0.0120482	370.892	8.53485	0.00269621	0.00468905	DHAK_HUMAN
PF02734	DAK2 domain	1	30784	3.24844e-05	1	83	0.0120482	370.892	8.53485	0.00269621	0.00468905	DHAK_HUMAN
PF04106	Autophagy protein Apg5	1	30784	3.24844e-05	1	83	0.0120482	370.892	8.53485	0.00269621	0.00468905	ATG5_HUMAN
PF04110	Ubiquitin-like autophagy protein Apg12	1	30784	3.24844e-05	1	83	0.0120482	370.892	8.53485	0.00269621	0.00468905	ATG12_HUMAN
PF09034	TRADD, N-terminal domain	1	30784	3.24844e-05	1	83	0.0120482	370.892	8.53485	0.00269621	0.00468905	TRADD_HUMAN
PF05769	Protein of unknown function (DUF837)	2	30784	6.49688e-05	1	83	0.0120482	185.446	7.53485	0.00538523	0.00861637	SIKE1_HUMAN
PF11577	NF-kappa-B essential modulator NEMO	2	30784	6.49688e-05	1	83	0.0120482	185.446	7.53485	0.00538523	0.00861637	NEMO_HUMAN
PF12721	RIP homotypic interaction motif	4	30784	0.000129938	1	83	0.0120482	92.7229	6.53485	0.0107418	0.0165259	RIPK1_HUMAN
PF01302	CAP-Gly domain	12	30784	0.000389813	1	83	0.0120482	30.9076	4.94989	0.0318846	0.0472364	CYLD_HUMAN
PF02338	OTU-like cysteine protease	14	30784	0.000454782	1	83	0.0120482	26.4923	4.7275	0.0371001	0.0530002	OTUD5_HUMAN
PF07714	Protein tyrosine kinase	116	30784	0.00376819	2	83	0.0240964	6.39468	2.67687	0.0393035	0.0542117	M3K7_HUMAN, RIPK1_HUMAN
PF05729	NACHT domain	27	30784	0.000877079	1	83	0.0120482	13.7367	3.77997	0.070331	0.0937747	NLRX1_HUMAN
PF00619	Caspase recruitment domain*	29	30784	0.000942048	1	83	0.0120482	12.7894	3.67687	0.0753419	0.0972154	IFIH1_HUMAN
PF13637	Ankyrin repeats (many copies)	35	30784	0.00113695	1	83	0.0120482	10.5969	3.40557	0.090215	0.112769	IKBB_HUMAN
PF00097	Zinc finger, C3HC4 type (RING finger)	43	30784	0.00139683	1	83	0.0120482	8.62539	3.10859	0.109679	0.125347	TRAF2_HUMAN
PF00240	Ubiquitin family	42	30784	0.00136435	1	83	0.0120482	8.83075	3.14254	0.107268	0.125347	ISG15_HUMAN
PF13765	SPRY-associated domain	43	30784	0.00139683	1	83	0.0120482	8.62539	3.10859	0.109679	0.125347	TRI25_HUMAN
PF00397	WW domain	47	30784	0.00152677	1	83	0.0120482	7.89131	2.98026	0.119256	0.132506	PIN1_HUMAN
PF13516	Leucine Rich repeat	58	30784	0.0018841	1	83	0.0120482	6.39468	2.67687	0.145071	0.156833	NLRX1_HUMAN
PF00443	Ubiquitin carboxyl-terminal hydrolase	62	30784	0.00201403	1	83	0.0120482	5.98212	2.58066	0.154271	0.162391	CYLD_HUMAN
PF00622	SPRY domain	98	30784	0.00318347	1	83	0.0120482	3.78461	1.92014	0.232797	0.238766	TRI25_HUMAN
PF12796	Ankyrin repeats (3 copies)	313	30784	0.0101676	1	83	0.0120482	1.18496	0.244835	0.572316	0.572316	IKBB_HUMAN
Listed are all domains that are present in at least one RLR pathway component.
Grey rows indicate statistically significantly enriched domains at Benjamini-Hochberg-corrected Fisher’s exact P < 0.01 (adjusted for testing 40 domains).
* The caspase recruitment (CARD) domain hidden Markov model (HMM) from Pfam does not detect the CARDs in human RIG-I (DDX58).
