# Supplementary material for: Integrative Genomics-Based Discovery of Novel Regulators of the Innate Antiviral Response
Source: PLoS Comput Biol. 2015 Oct 20;11(10):e1004553. doi: 10.1371/journal.pcbi.1004553 (PMC4618338; doi:10.1371/journal.pcbi.1004553)
Supplement: S5 Table — (XLSX) [file pcbi.1004553.s019.xlsx]

## Sheet: TFs of RLR pathway components
Transcription factor (TF) motif	TF motif occurrences in genome	Total TF motif occurrences in genome	Genome odds	TF motif occurrences in RLR pathway components	Total TF motif occurrences in RLR pathway components	RLR pathway components odds	Odds ratio	Log2 odds ratio	Fisher’s exact P	Benjamini-Hochberg-corrected Fisher’s exact P	RLR pathway components with TF motif (Ensembl gene ID)	RLR pathway components with TF motif (gene symbol)
NF-kappaB	1547	17491	0.0884455	13	48	0.270833	3.06215	1.61454	0.000195212	0.00078	ENSG00000064012, ENSG00000068308, ENSG00000083799, ENSG00000100906, ENSG00000102871, ENSG00000104365, ENSG00000104825, ENSG00000109320, ENSG00000112062, ENSG00000127191, ENSG00000136560, ENSG00000143466, ENSG00000188130	CASP8, OTUD5, CYLD, NFKBIA, TRADD, IKBKB, NFKBIB, NFKB1, MAPK14, TRAF2, TANK, IKBKE, MAPK12
Irf	922	17491	0.0527128	8	48	0.166667	3.16179	1.66074	0.00333594	0.00668	ENSG00000083799, ENSG00000107201, ENSG00000108771, ENSG00000109339, ENSG00000115267, ENSG00000121060, ENSG00000185507, ENSG00000187608	CYLD, DDX58 (RIG-I), DHX58 (LGP2), MAPK10, IFIH1 (MDA5), TRIM25, IRF7, ISG15
AP-1	1963	17491	0.112229	9	48	0.1875	1.67069	0.740443	0.0834215	0.0887	ENSG00000064012, ENSG00000073009, ENSG00000127191, ENSG00000131323, ENSG00000143466, ENSG00000156711, ENSG00000160703, ENSG00000183735, ENSG00000198933	CASP8, IKBKG, TRAF2, TRAF3, IKBKE, MAPK13, NLRX1, TBK1, TBKBP1
STAT	1411	17491	0.0806701	7	48	0.145833	1.80778	0.854215	0.0886956	0.0887	ENSG00000064012, ENSG00000109339, ENSG00000121060, ENSG00000137275, ENSG00000175104, ENSG00000185507, ENSG00000213341	CASP8, MAPK10, TRIM25, RIPK1, TRAF6, IRF7, CHUK
Grey rows indicate statistically significantly enriched TF motifs at Benjamini-Hochberg-corrected Fisher’s exact P < 0.01 (adjusted for testing 4 TFs).
